# Supplementary material for: Synthesis and antioxidant evaluation of lipophilic oleuropein aglycone derivatives
Source: Royal Society of Chemistry journal article supplement (doi:10.1039/c7fo01105a), 2017-01-01

## SUPPORTING INFORMATION

### Synthesis and Antioxidant Evaluation of Lipophilic Oleuropein Aglycone Derivatives.

Monica Nardi,<sup>\*†§</sup> Sonia Bonacci,<sup>‡</sup> Luca Cariati,<sup>‡</sup> Paola Costanzo,<sup>‡</sup> Manuela Oliverio,<sup>‡</sup> Giovanni Sindona<sup>†</sup> and Antonio Procopio<sup>‡</sup>.

<sup>†</sup> Dipartimento di Chimica, Università della Calabria, Arcavacata di Rende (CS), Italy

<sup>§</sup> Università Telematica San Raffaele, Roma Italy

<sup>‡</sup> Dipartimento di Scienze della Salute, Università “Magna Græcia” di Catanzaro, Catanzaro, Italy

|                                                                                                           |       |
|-----------------------------------------------------------------------------------------------------------|-------|
| Synthesis of Oleuropein Aglicone derivatives with 10% Er(OTf) <sub>3</sub> by Oleuropein                  | p. 3  |
| <b>Table S1.</b> Synthesis of Oleuropein Aglicone derivatives with 10% Er(OTf) <sub>3</sub> by Oleuropein | p.3   |
| <sup>1</sup> H-NMR and <sup>13</sup> C-NMR spectrum of Methyl Oleuropein Aglicone (3)                     | p.4   |
| <sup>1</sup> H-NMR and <sup>13</sup> C-NMR spectrum of Ethyl Oleuropein Aglicone (4)                      | p.6   |
| <sup>1</sup> H-NMR and <sup>13</sup> C-NMR spectrum of Oleyl Oleuropein Aglicone (10)                     | p. 8  |
| LC-MS spectrum of Ethyl Oleuropein Aglicone (4)                                                           | p. 9  |
| Determination of LogK <sub>ow</sub>                                                                       | p. 10 |
| <b>Figure S1.</b> Chromatograms registered to both wavelengths of 254 and 280 nm                          | p. 10 |
| <b>Table S2.</b> Log P values of standard compounds                                                       | p. 11 |
| <b>Figure S2.</b> Linear Plot Log k' correlated with Log Kow                                              | p. 12 |
| HPLC Chromatogram of Oleuropein Aglicone (2)                                                              | p. 13 |
| HPLC Chromatogram of Methyl Oleuropein Aglicone (3)                                                       | p. 13 |
| HPLC Chromatogram of Ethyl Oleuropein Aglicone (4)                                                        | p. 14 |
| HPLC Chromatogram of Phenyl Oleuropein Aglicone (5)                                                       | p. 14 |
| HPLC Chromatogram of trans-Hexenyl Oleuropein Aglicone (6)                                                | p. 15 |
| HPLC Chromatogram of cis-Hexenyl Oleuropein Aglicone (7)                                                  | p. 15 |
| HPLC Chromatogram of Octyl Oleuropein Aglicone (9)                                                        | p. 16 |
| Measurement of oxygen radical absorbance capacity (ORAC <sub>FL</sub> )                                   | p. 17 |
| <b>Fig.S3</b> FL fluorescence decay curve induced by AAPH                                                 | p.17  |
| <b>Fig. S4</b> Linear plot of AUC vs Trolox concentrations                                                | p. 17 |
| DPPH radical scavenging activity                                                                          | p. 18 |

|                                                                                        |              |
|----------------------------------------------------------------------------------------|--------------|
| <b>Fig. S5</b> Absorbance induced by DPPH                                              | <i>p. 18</i> |
| <b>Fig. S6</b> Linear plot DPPH Assay of Methyl Oleuropein Aglicone (3)                | <i>p. 18</i> |
| <b>Fig. S7</b> Linear plot DPPH Assay of Ethyl Oleuropein Aglicone (4)                 | <i>p. 19</i> |
| <b>Fig. S8</b> Linear plot DPPH Assay of Phenyl Oleuropein Aglicone (5)                | <i>p. 19</i> |
| <b>Fig. S9</b> Linear plot DPPH Assay of <i>trans</i> -Hexenyl Oleuropein Aglicone (6) | <i>p. 20</i> |
| <b>Fig. S10</b> Linear plot DPPH Assay of <i>cis</i> -Hexenyl Oleuropein Aglicone (7)  | <i>p. 20</i> |
| <b>Fig. S11</b> Linear plot DPPH Assay of Palmityl Oleuropein Aglicone (8)             | <i>p. 21</i> |
| <b>Fig. S12</b> Linear plot DPPH Assay of Octyl Oleuropein Aglicone (9)                | <i>p. 21</i> |
| <b>Fig. S13</b> Linear plot DPPH Assay of Oleyl Oleuropein Aglicone (10)               | <i>p. 22</i> |
| <b>Fig. S14</b> IC50 of Oleuropein Aglicone derivates in DPPH Assay                    | <i>p. 22</i> |

**Table S1.** Synthesis of Oleuropein Aglicone derivatives with 10% Er(OTf)<sub>3</sub> by Oleuropein

| Entry          | ROH                      | Time    | Yield % <sup>a</sup> |
|----------------|--------------------------|---------|----------------------|
| 1 <sup>b</sup> | MeOH                     | 1 h 30' | 80                   |
| 2 <sup>b</sup> | EtOH                     | 1 h 30' | 80                   |
| 3 <sup>c</sup> | PhOH                     | 4 h     | 78                   |
| 4 <sup>c</sup> | <i>trans</i> -Hexen-2-ol | 4 h     | 75                   |
| 5 <sup>c</sup> | <i>cis</i> -Hexen-2-ol   | 4 h     | 80                   |
| 6 <sup>c</sup> | Octanyl alcohol          | 4 h     | 72                   |
| 7 <sup>c</sup> | Palmityl alcohol         | 4 h     | 60                   |
| 8 <sup>c</sup> | Oleyl alcohol            | 4 h     | 70                   |

<sup>a</sup> Determinated by HPLC; <sup>b</sup> Oleuropein (0,92 mmol) was dissolved in MeOH/EtOH (4 mL) in the presence of Er(OTf)<sub>3</sub> (0.046 mmol) and refluxed at 80° C for 1h 30'. <sup>c</sup> Oleuropein (0,92 mmol) was dissolved in acetonitrile (4 mL) in the presence of Er(OTf)<sub>3</sub> (0.046 mmol) and the alcohol (1,104 mmol) refluxed at 80° C for 4h.

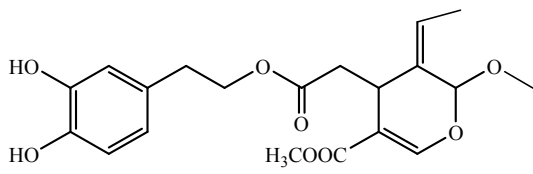

Methyl Oleuropein Aglicone (3)

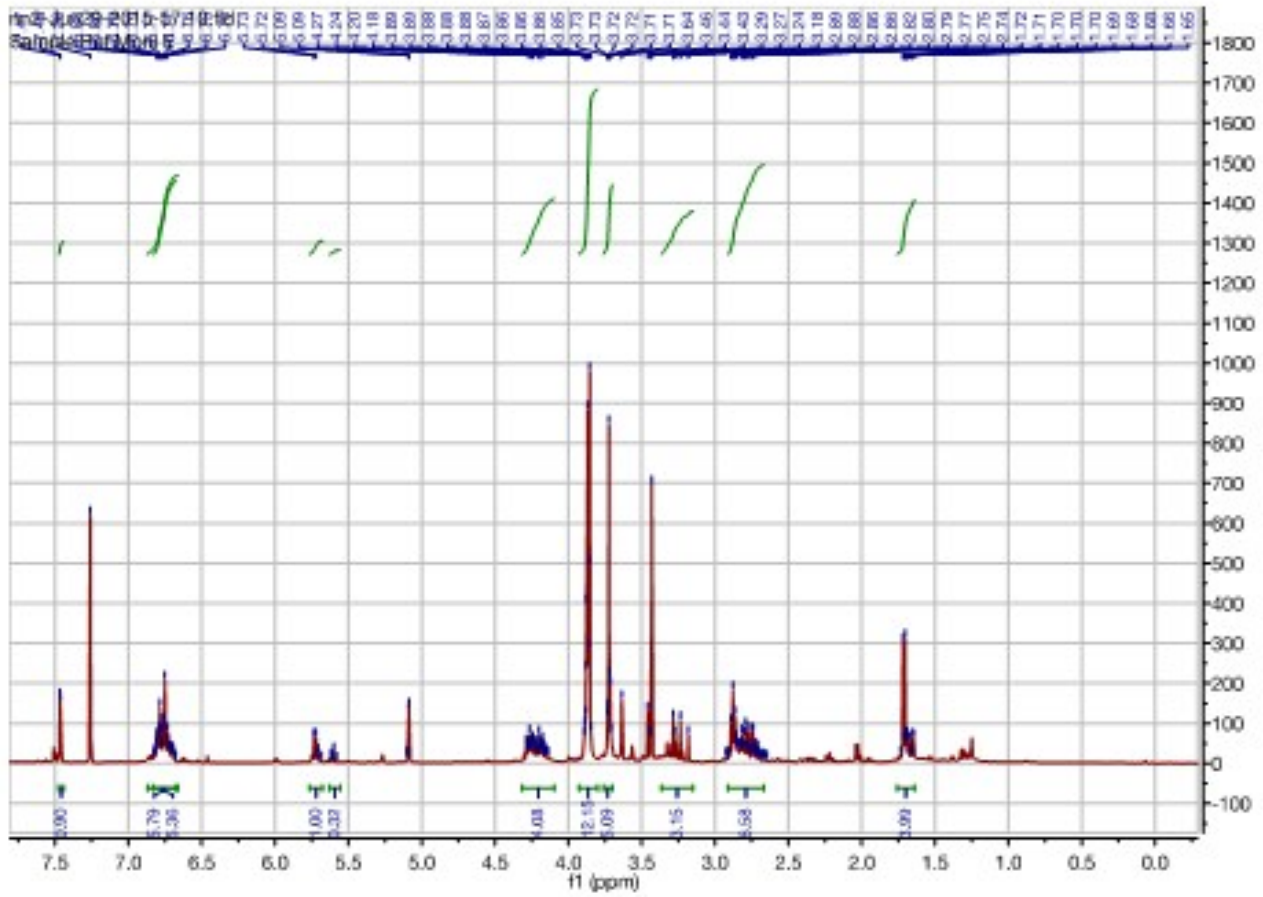

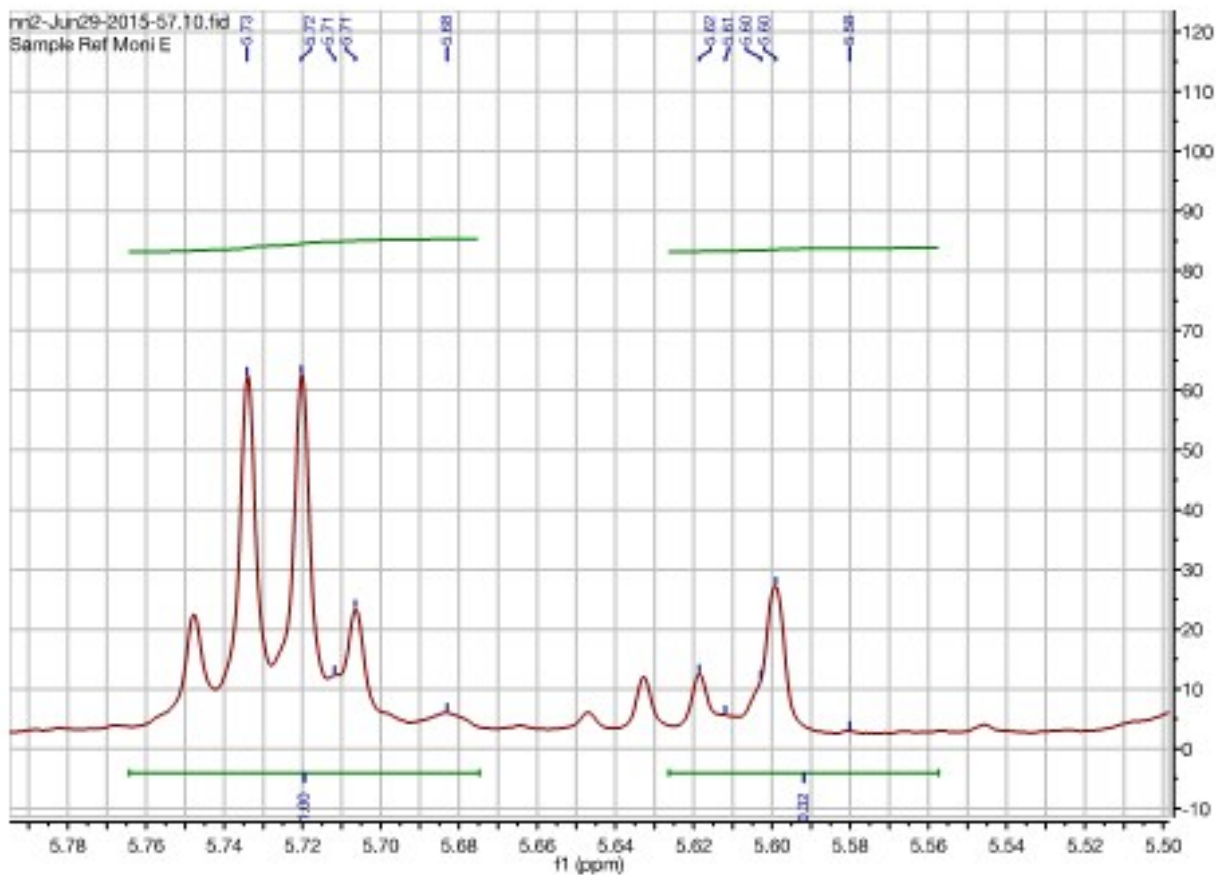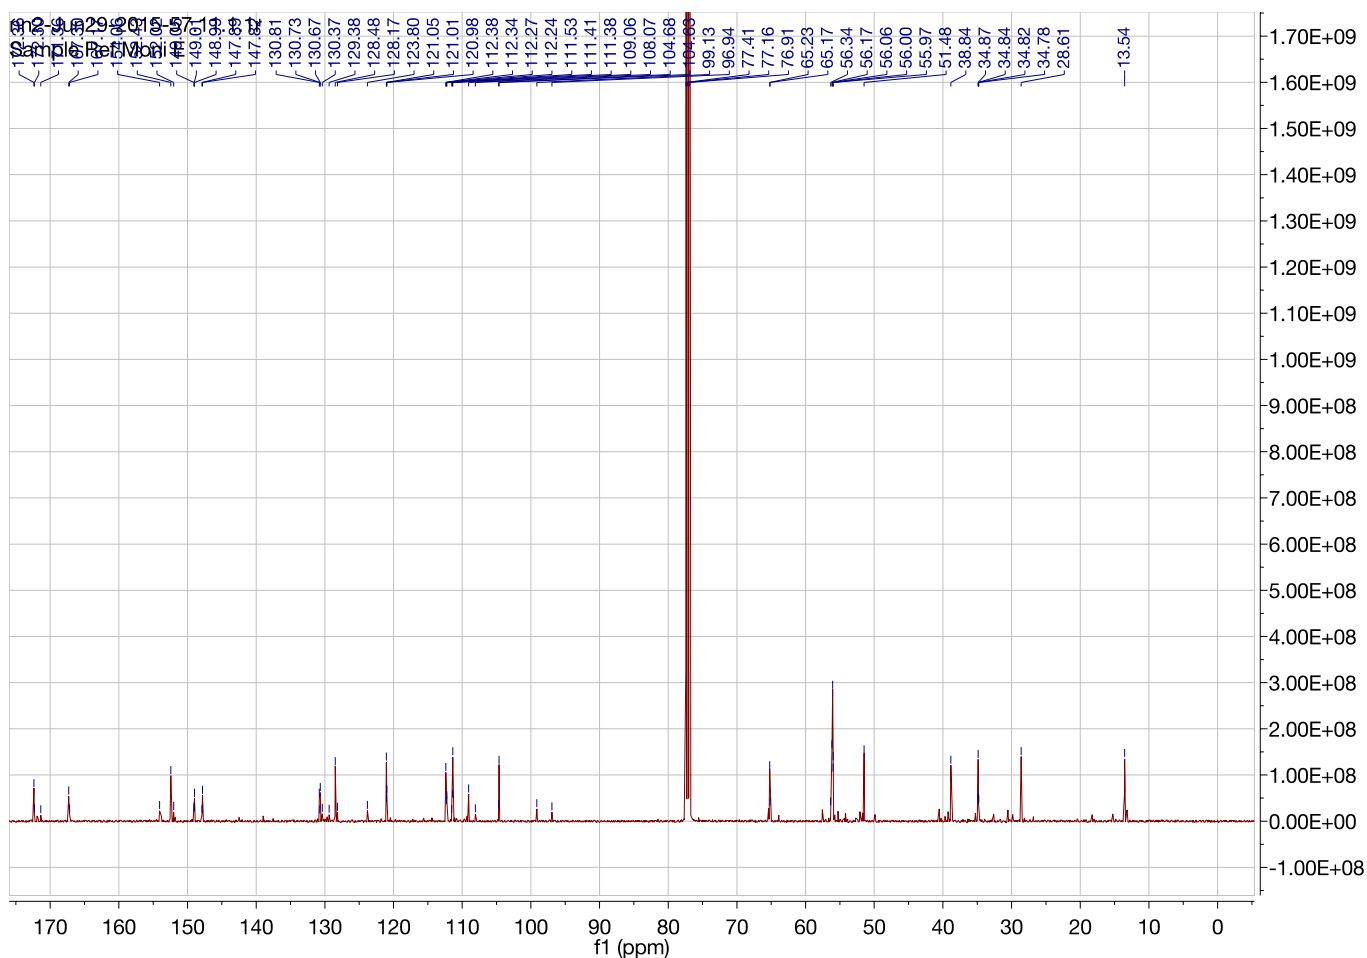

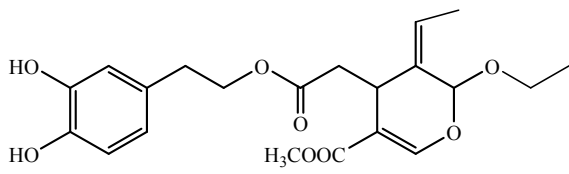

Ethyl Oleuropein Aglicone (4)

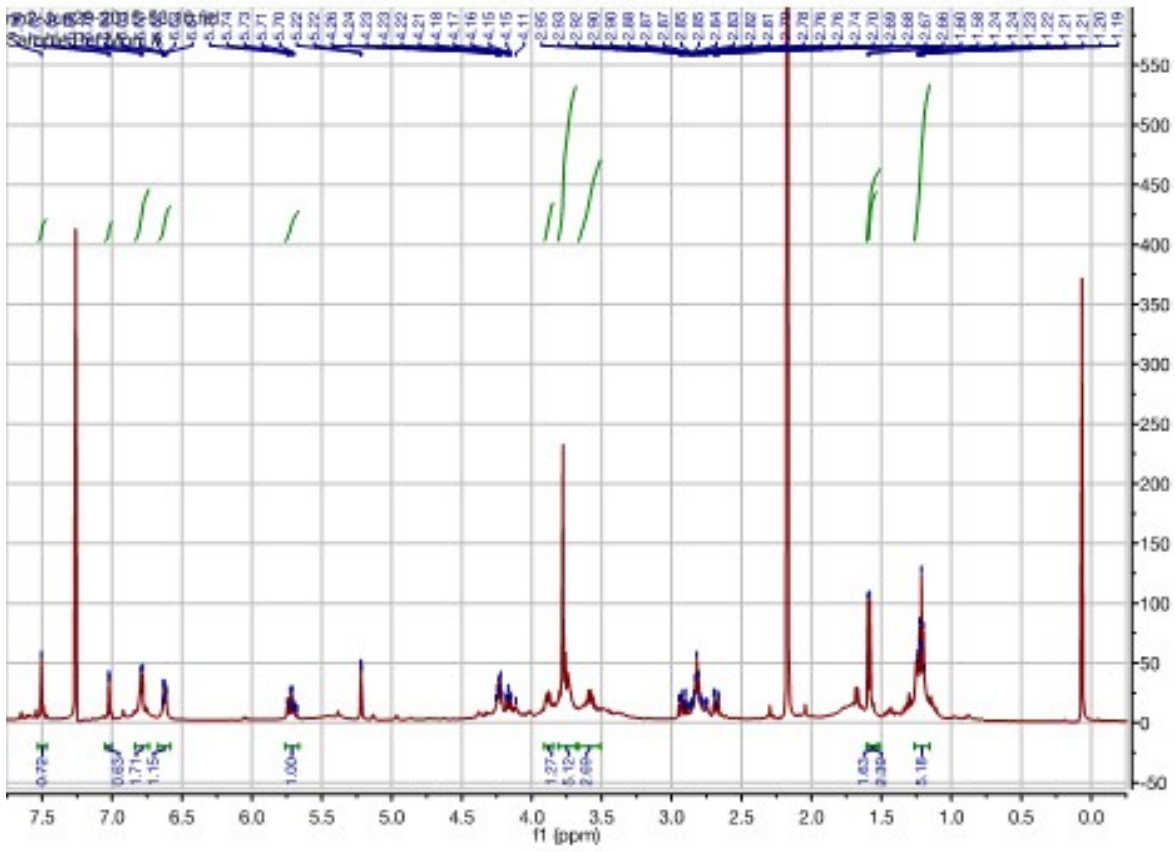

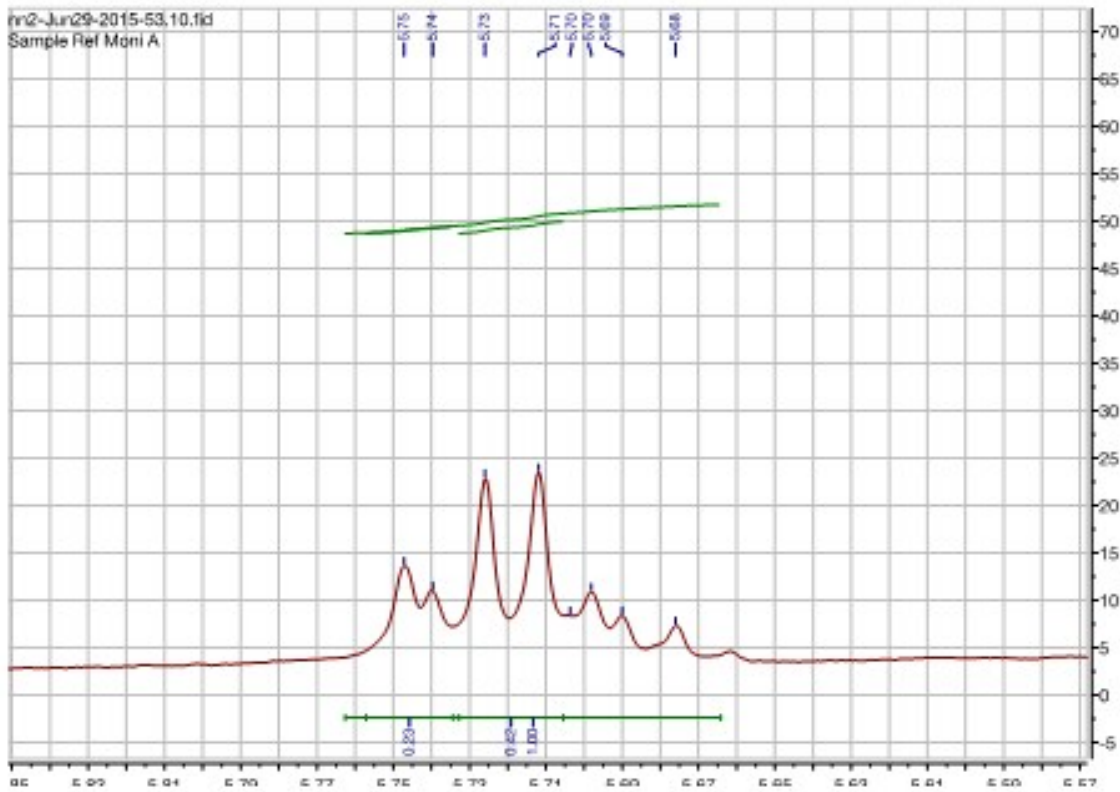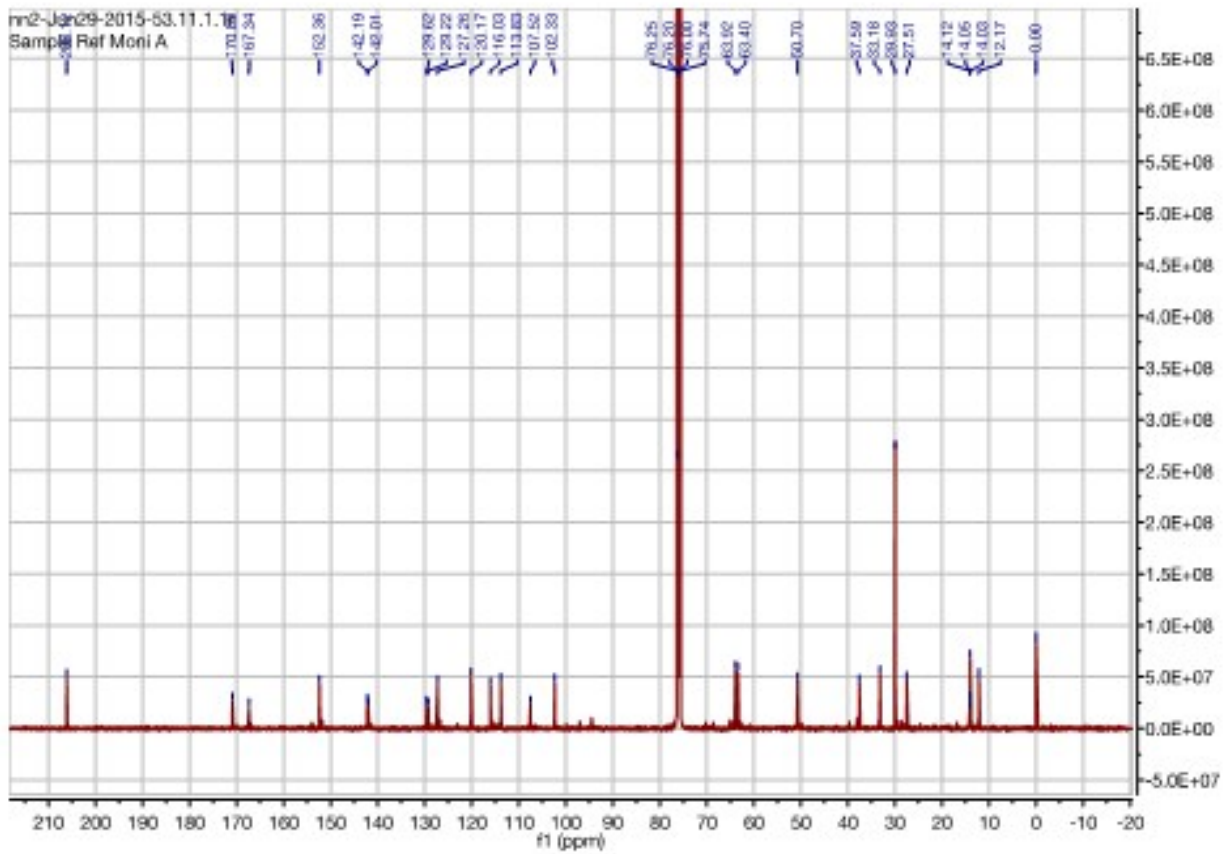

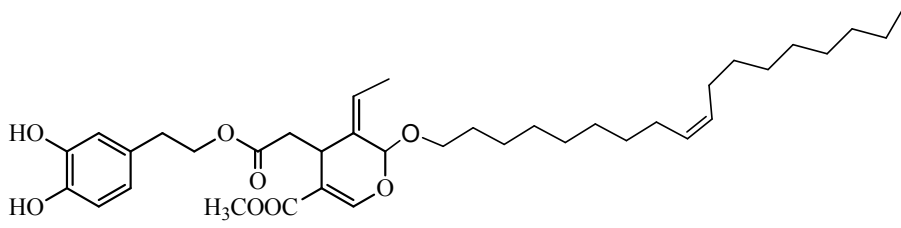

Oleyl Oleuropein Aglicone (10)

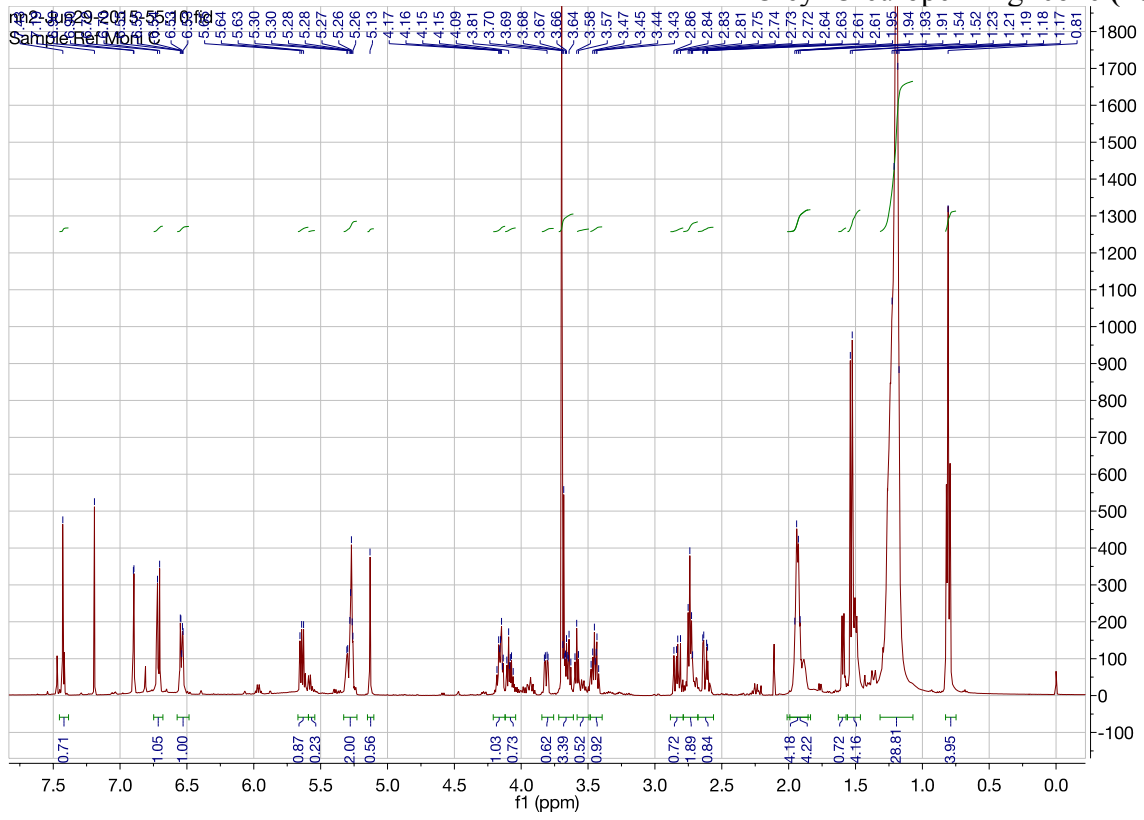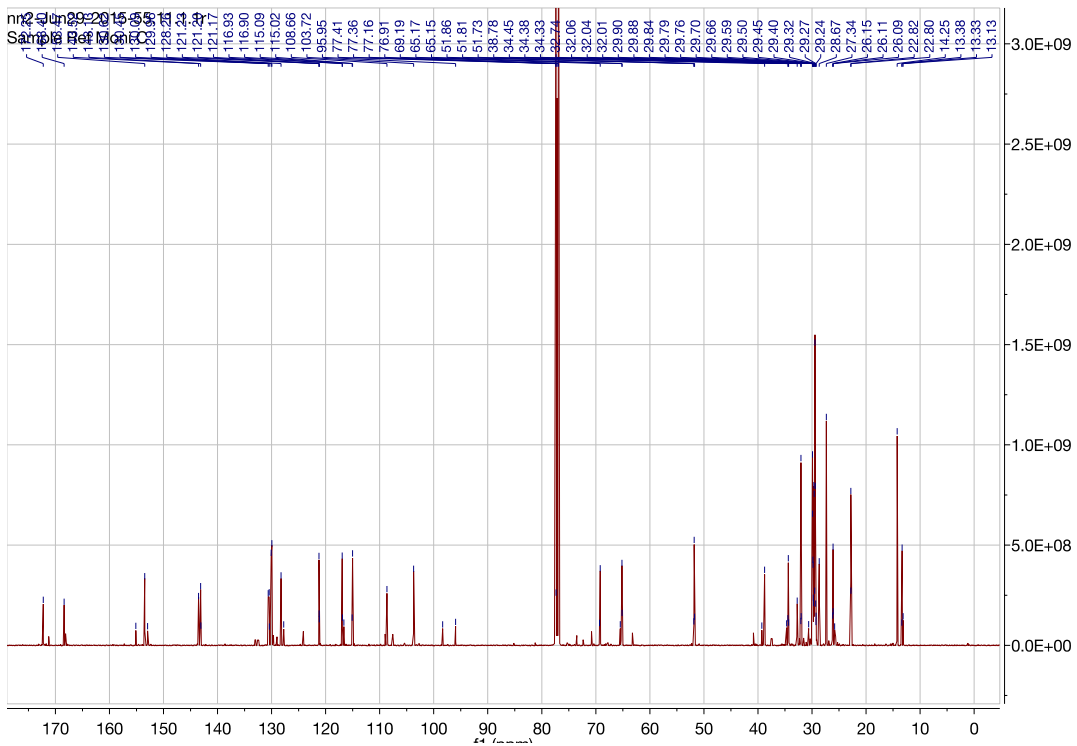



LC-MS spectrum of Ethyl Oleuropein Aglicone (4) : LC/UV/MS (A). ESI - MS spectra (B).

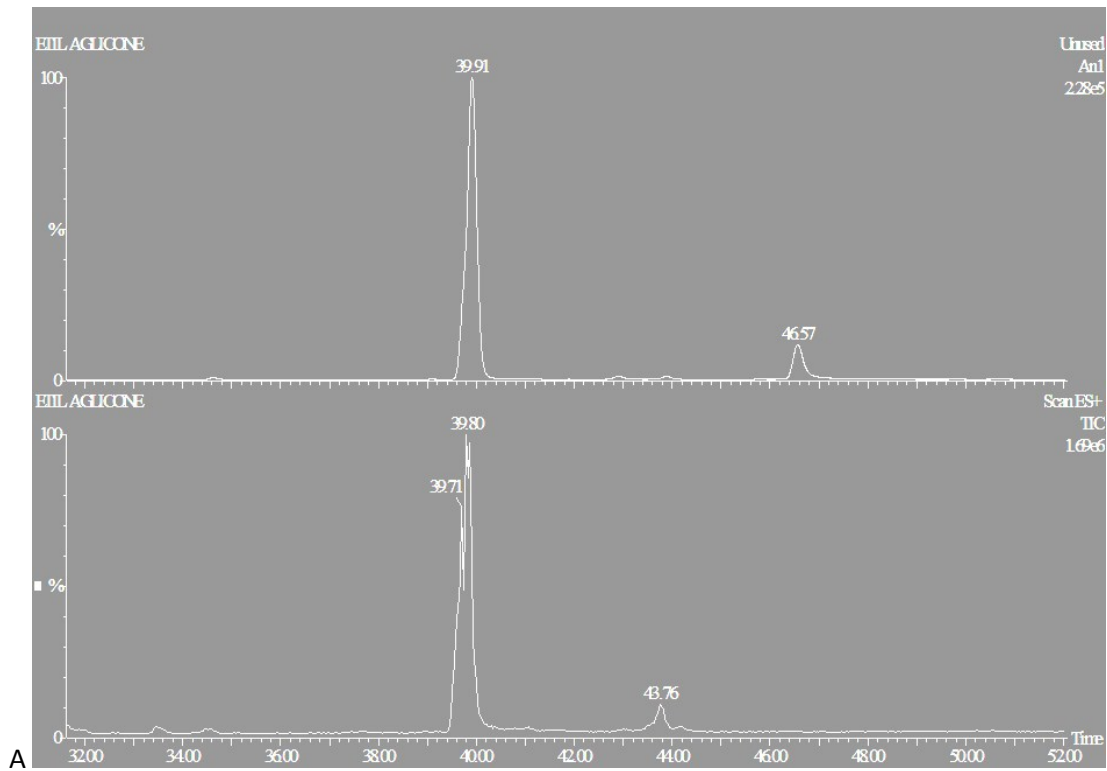

A

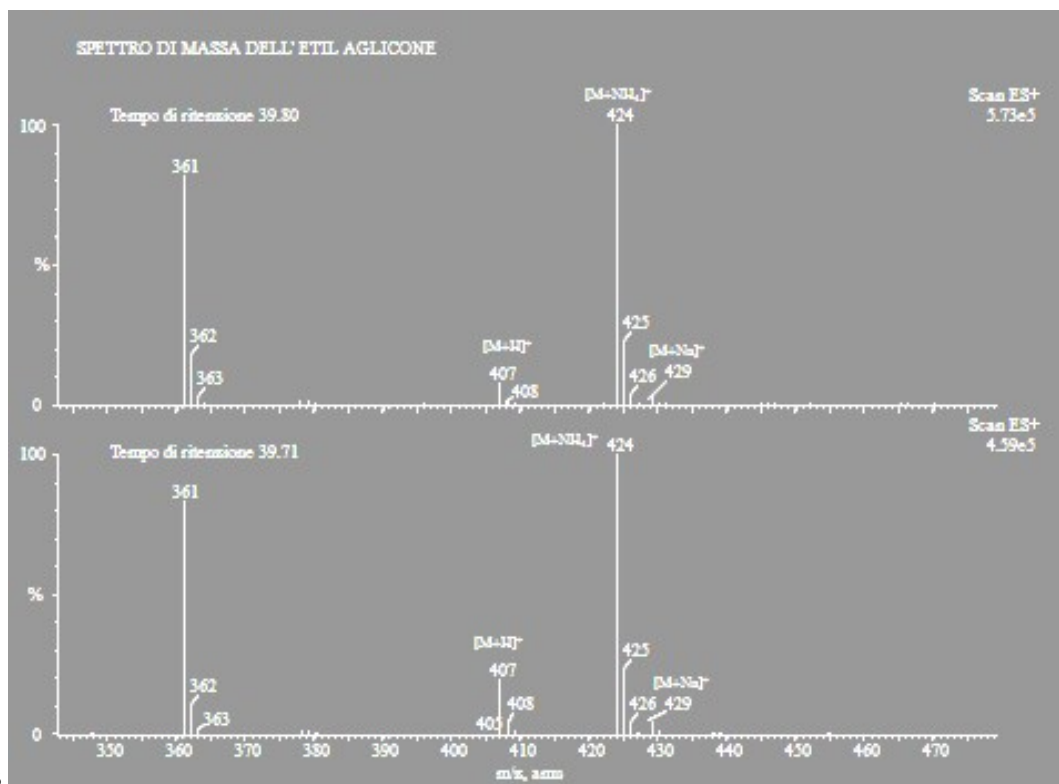

B

### Determination of $\text{Log}K_{ow}$

To calibrate the RP-HPLC system, a suite of four well-defined organic compounds with known Log P has been used as standards. All of the standard substances are 99% grade and were obtained from Aldrich. Stock solutions containing 10  $\mu\text{g}/\text{ml}$  of a single compound were prepared by dissolving them in mobile phase solution (40% water/ $\text{CF}_3\text{COOH}$ ,  $\text{PH}= 2.4$ , 60% methanol). Multiple injections of single standards were performed to define the individual retention times and their reproducibility as well as stability of these selected compounds. Figure S1 shows the chromatograms registered to both wavelengths of 254 and 280 nm.

**Figure S1.** Chromatograms registered to both wavelengths of 254 and 280 nm

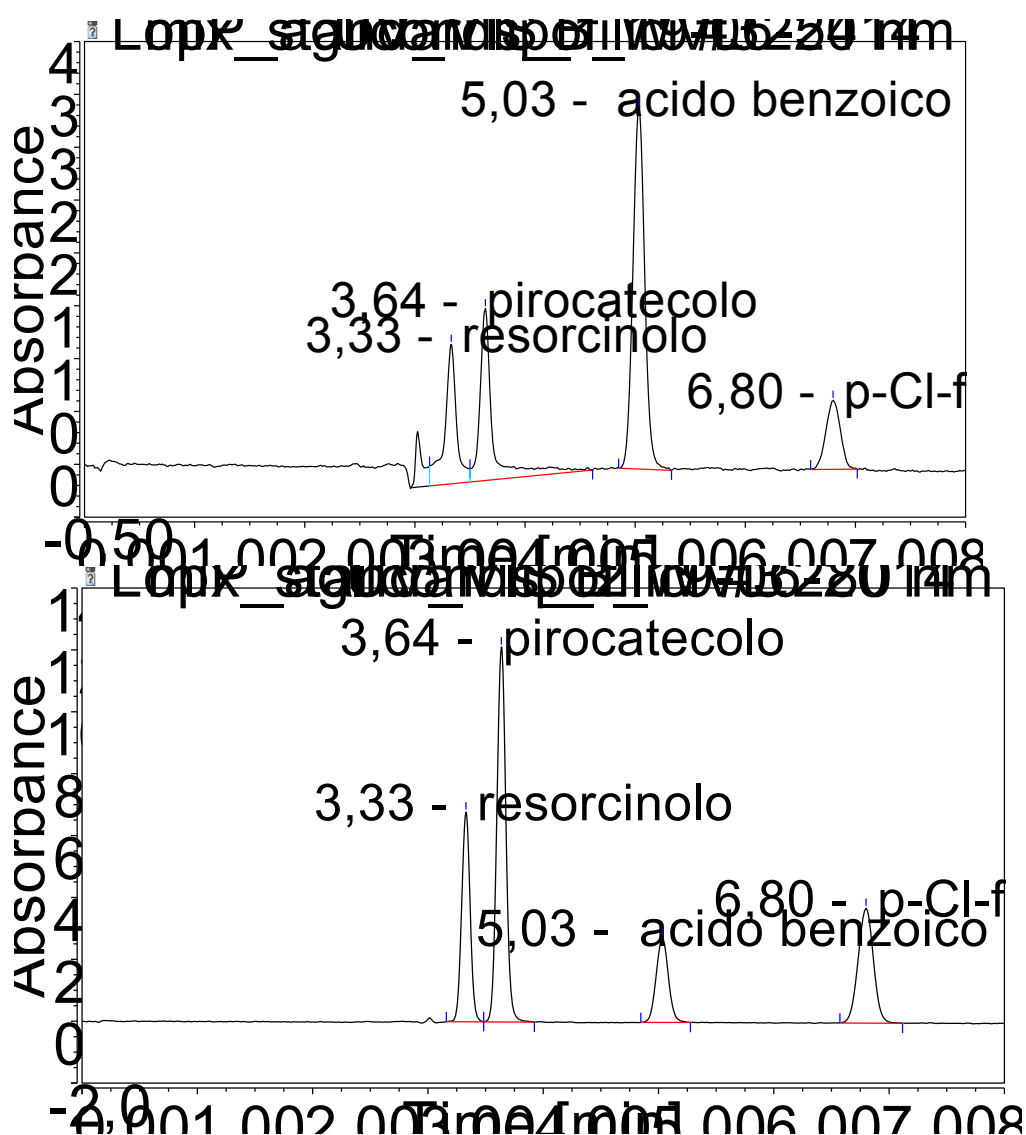

Capacity factor  $k'$  was calculated for each compound according to equation showed in literature.<sup>3</sup> Table S1 gives the Log P values of standard compounds, their retention time and their capacity factors.

**Table S2.** Log P values of standard compounds

| STANDARD     | R.T.  | T <sub>0</sub> | k'          | logk'        | logK <sub>ow</sub> |
|--------------|-------|----------------|-------------|--------------|--------------------|
| Resorcinol   | 3,330 | 3,013          | 0,105210753 | -0,977939869 | 0,59               |
| Pyrocatechol | 3,637 | 3,013          | 0,207102556 | -0,683814542 | 1,21               |
| Benzoic acid | 5,033 | 3,013          | 0,670428145 | -0,173647762 | 1,94               |
| p-Cl Phenol  | 6,797 | 3,013          | 1,255891138 | 0,098951996  | 2,39               |

Dead-time  $t_0$  was determined from the chromatogram obtained on mobile phase at the beginning of each sequence of analysis and has been defined as the time of the negative peak maximum.

Log  $k'$  were correlated with Log  $K_{ow}$  known values through a linear regression analysis<sup>38</sup> to obtain a “correlation curve” of the form

$$\log K_{ow} = a \log k' + b$$

with a slope ( $a$ ) of 1.628 and a regression coefficient of 0.994 (Figure S1)

Solutions containing 10 µg/ml of each unknown substances were prepared dissolving each 3,4-DHPEA-EA derivatives in the mobile phase. Three injections of each compound were performed to find the correct retention time. Capacity coefficient  $k'$  of each derivative was calculated as for the known compounds. Log  $K_{ow}$  of each oleuropein derivative was finally found by correlation with Log  $k'$  through the same linear regression determined before.

Figure S2. Linear Plot Log k' correlated with Log K<sub>ow</sub>

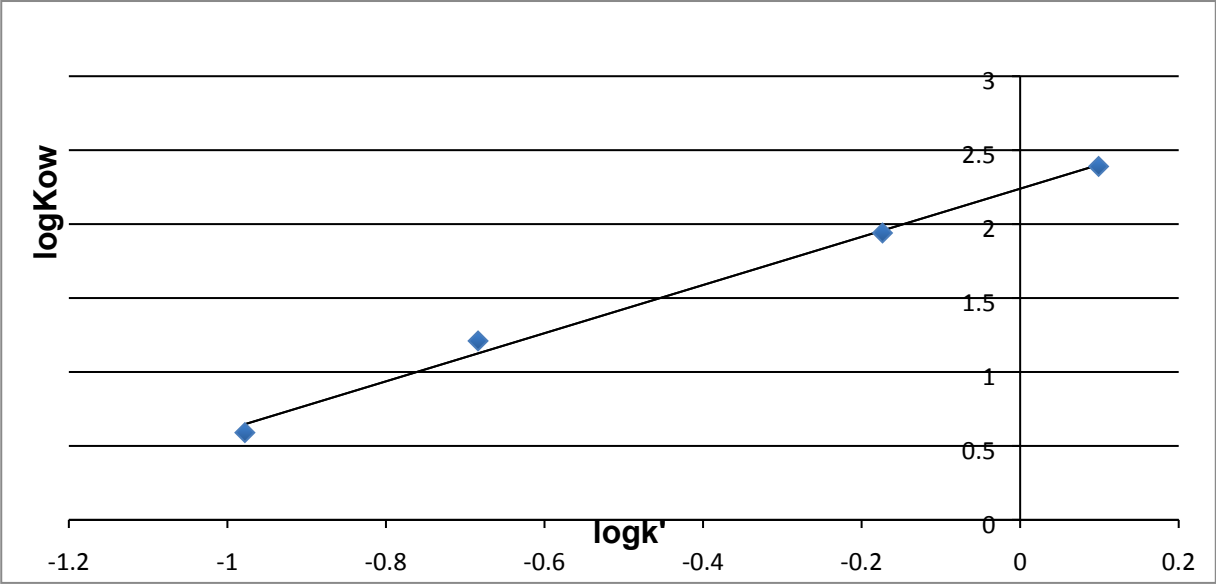

### HPLC Chromatogram of Oleuropein Aglicone (2)

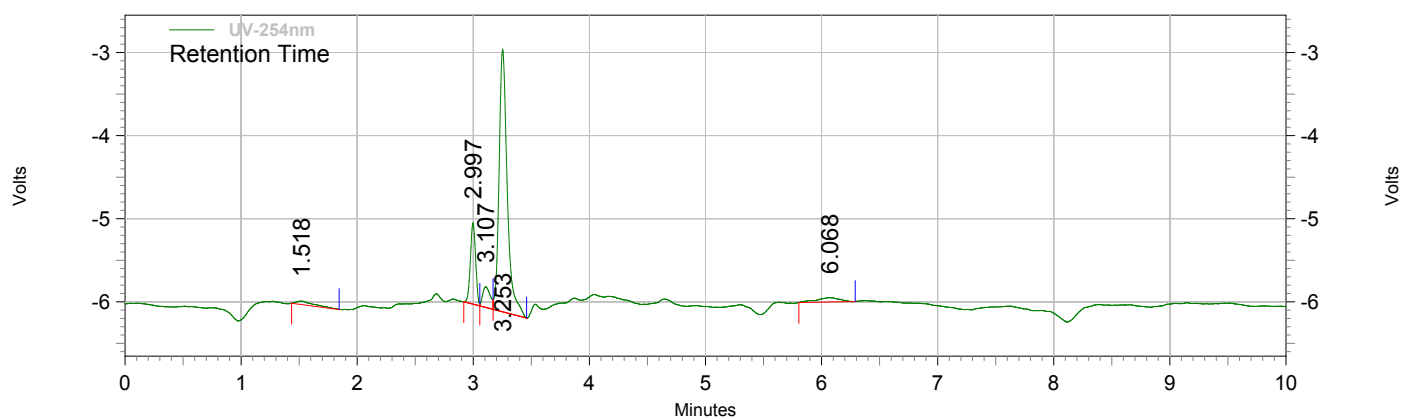

### HPLC Chromatogram of Methyl Oleuropein Aglicone (3)

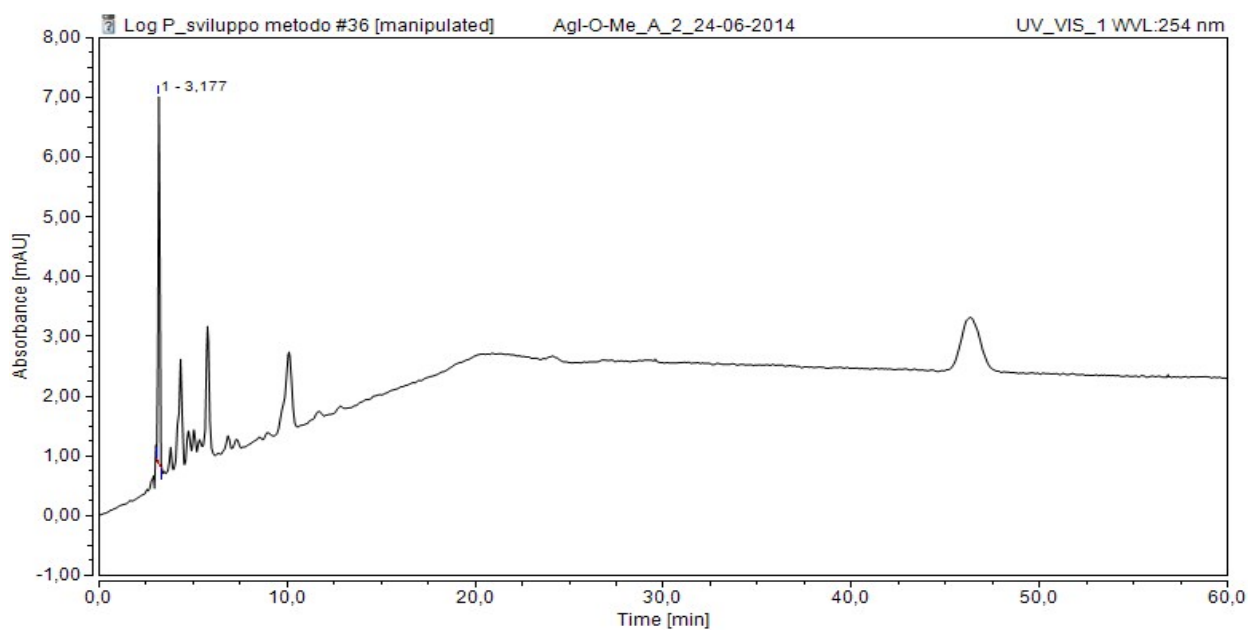

### HPLC Chromatogram of Ethyl Oleuropein Aglicone (4)

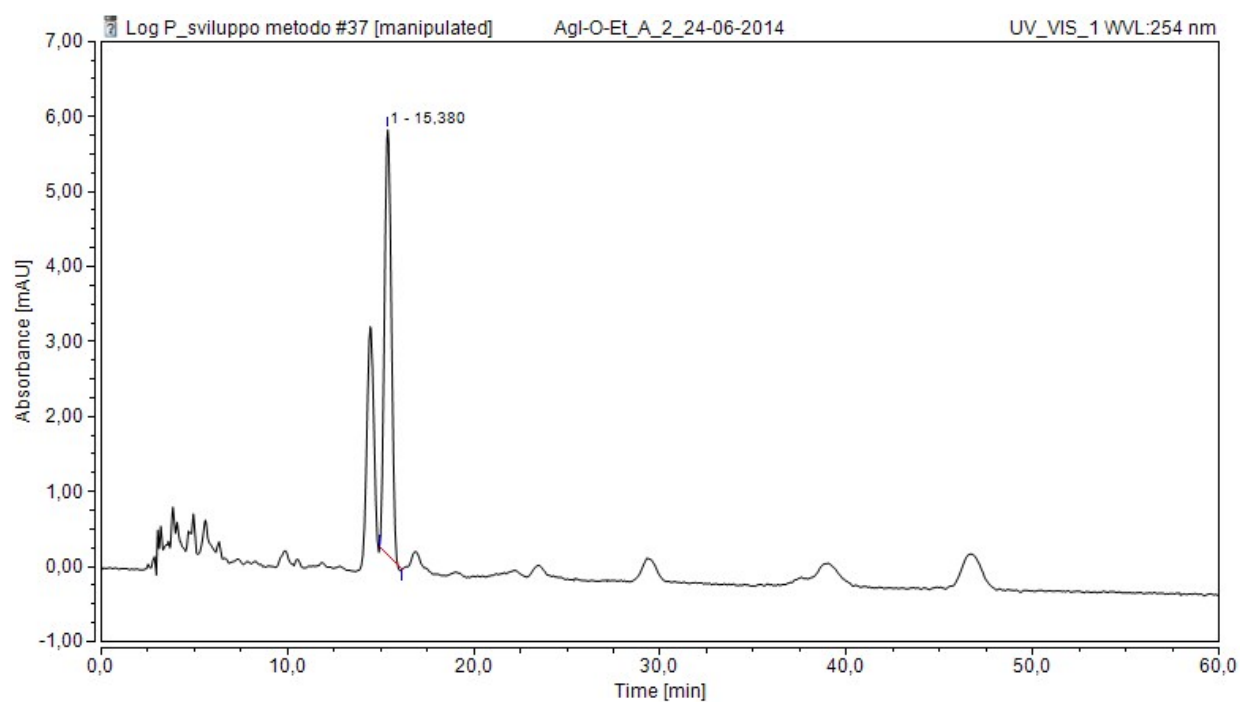

### HPLC Chromatogram of Phenyl Oleuropein Aglicone (5)

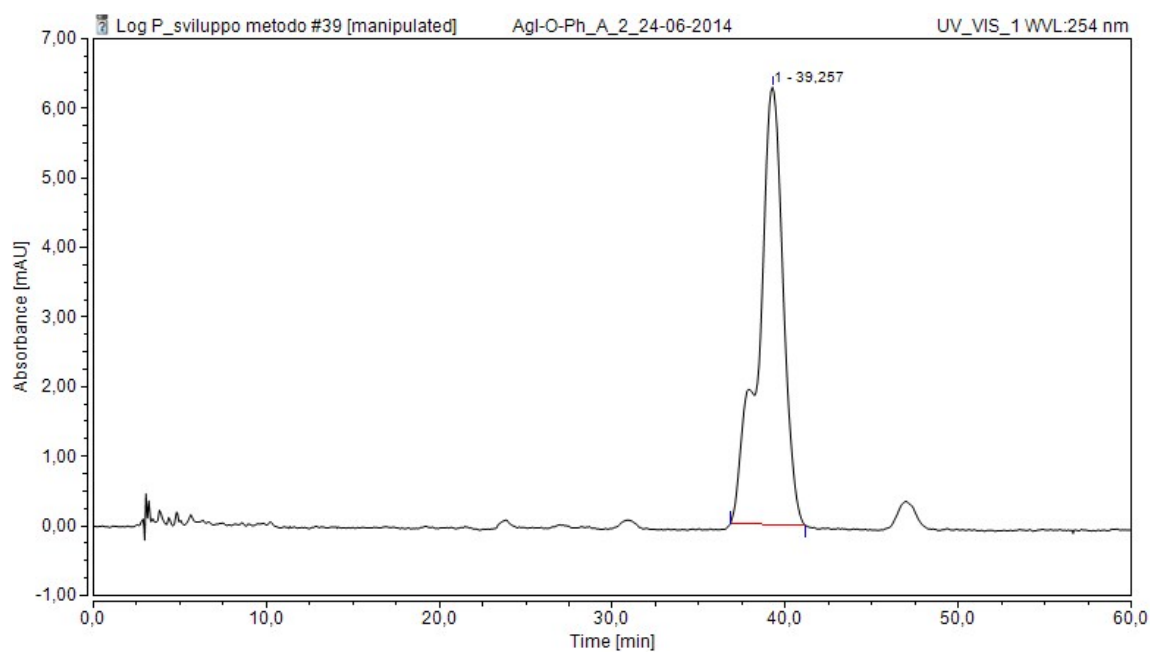

**HPLC Chromatogram of *trans*-Hexenyl Oleuropein Aglicone (6)**

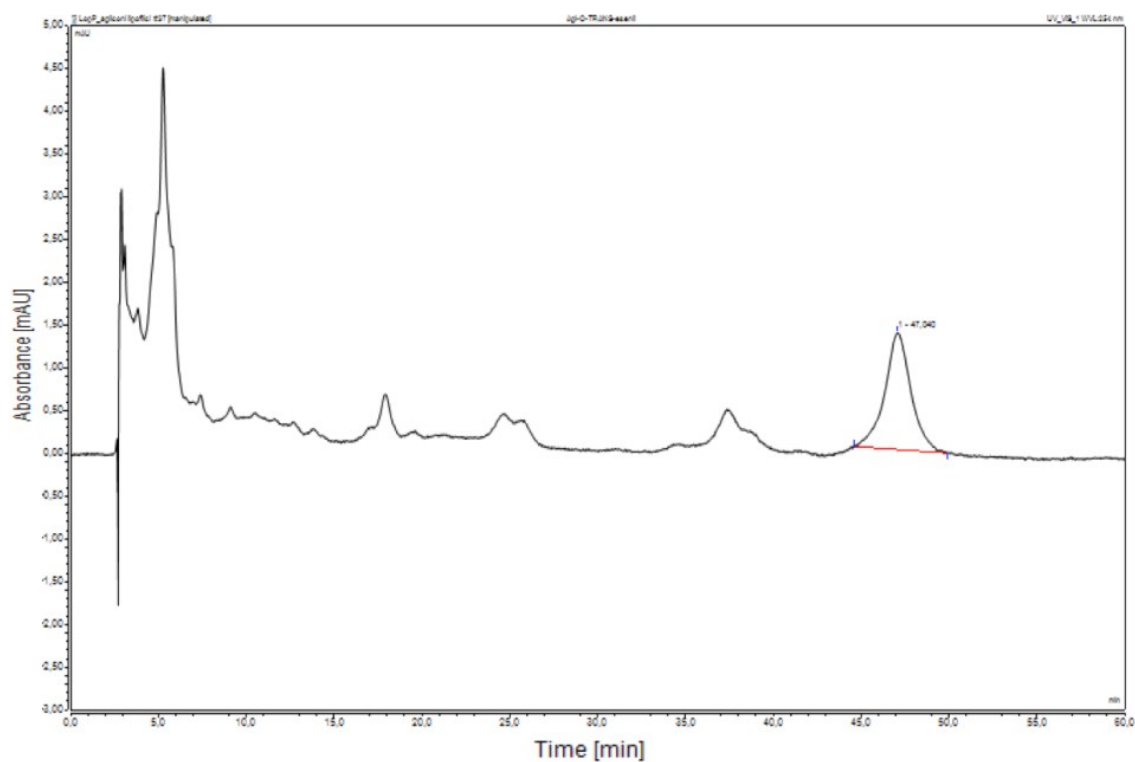

**HPLC Chromatogram of *cis*-Esenyl Oleuropein Aglicone (7)**

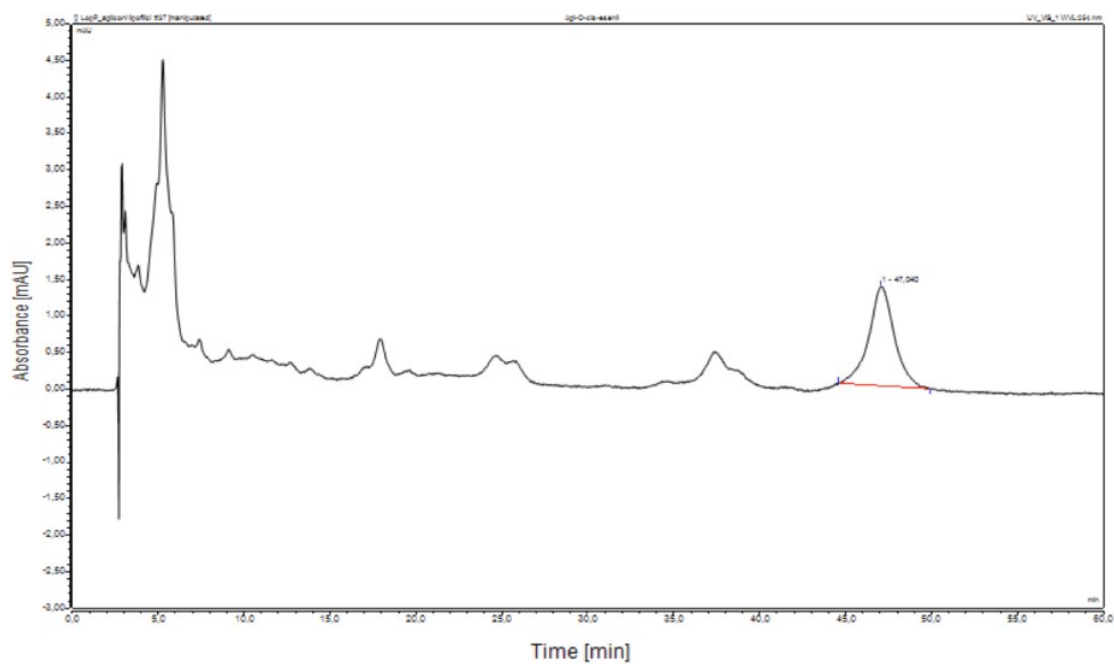

## HPLC Chromatogram of Octyl Oleuropein Aglicone (9)

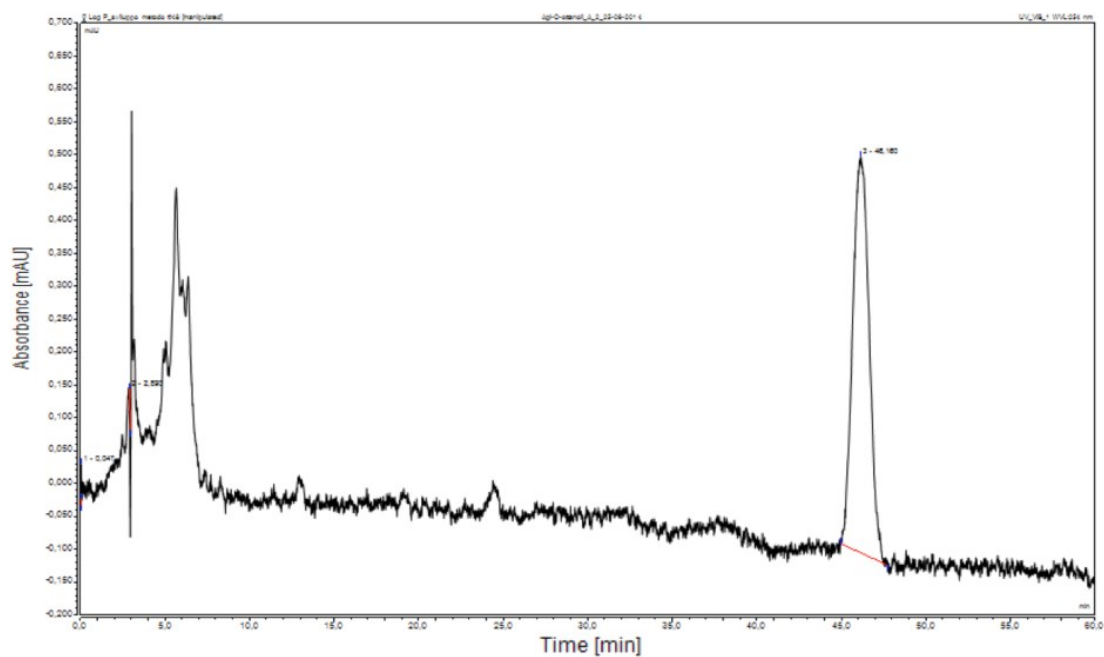



*Measurement of oxygen radical absorbance capacity (ORAC<sub>FL</sub>)*

**Fig.S3** FL fluorescence decay curve induced by AAPH

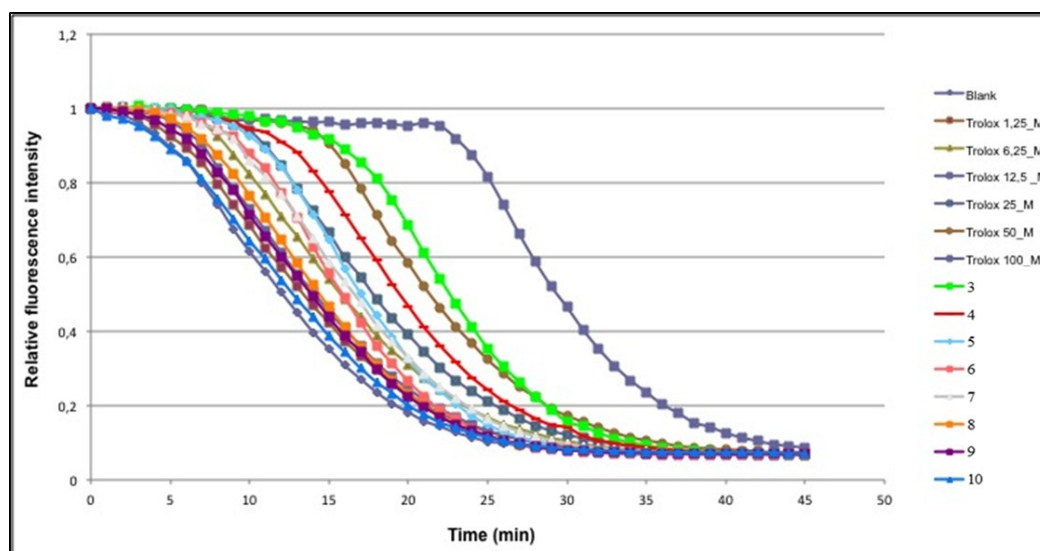

**Fig. S4** Linear plot of AUC vs Trolox concentrations

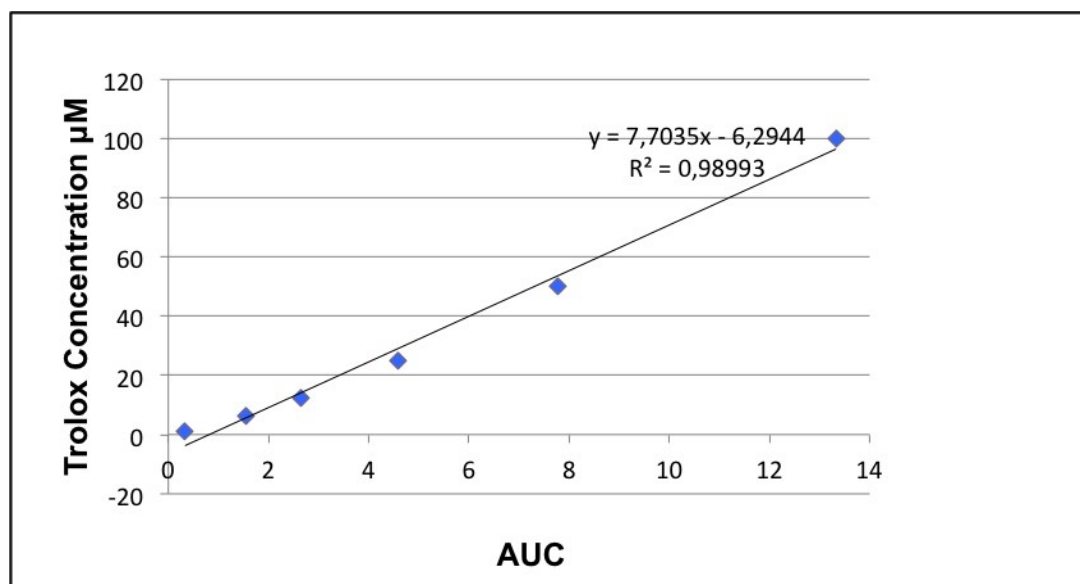

## DPPH radical scavenging activity

Fig. S5 Absorbance induced by DPPH

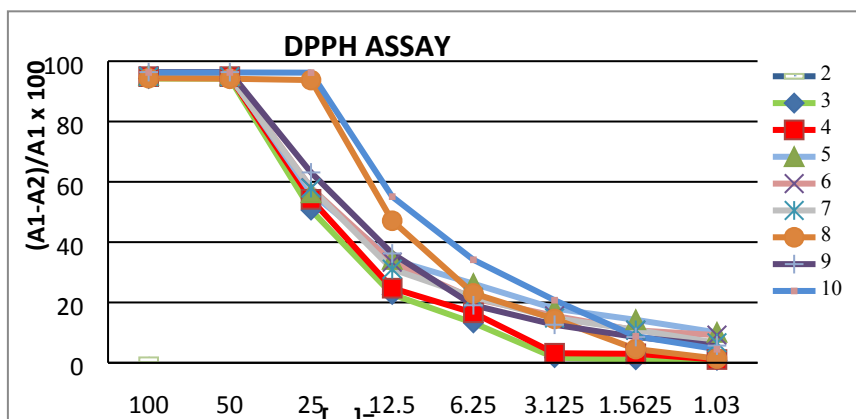

Fig. S6 Linear plot DPPH Assay of Methyl Oleuropein Aglicone (3)

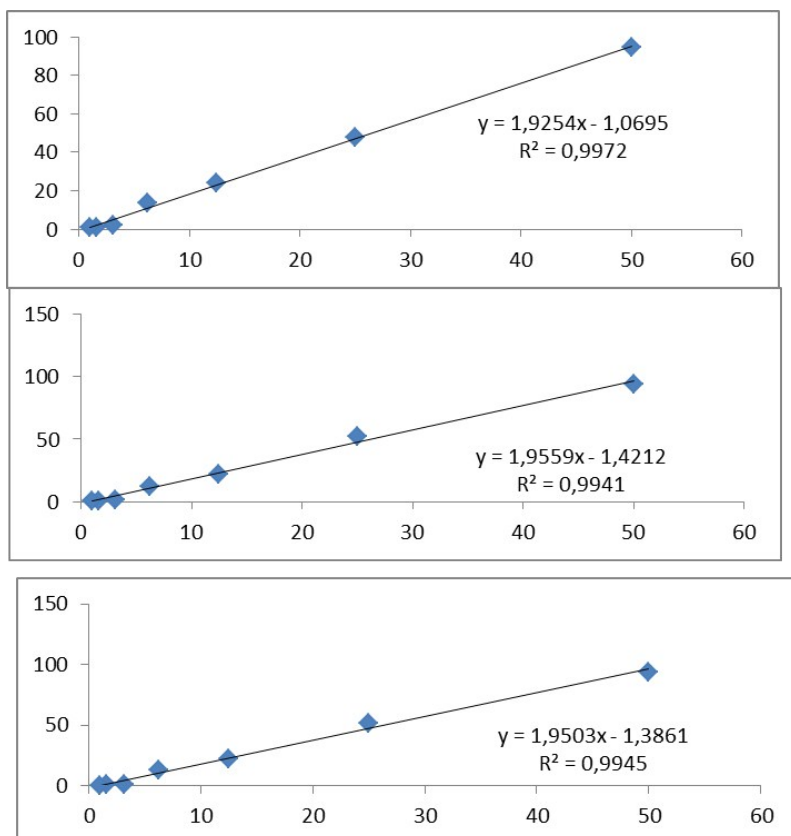

**Fig. S7** Linear plot DPPH Assay of Ethyl Oleuropein Aglicone (4)

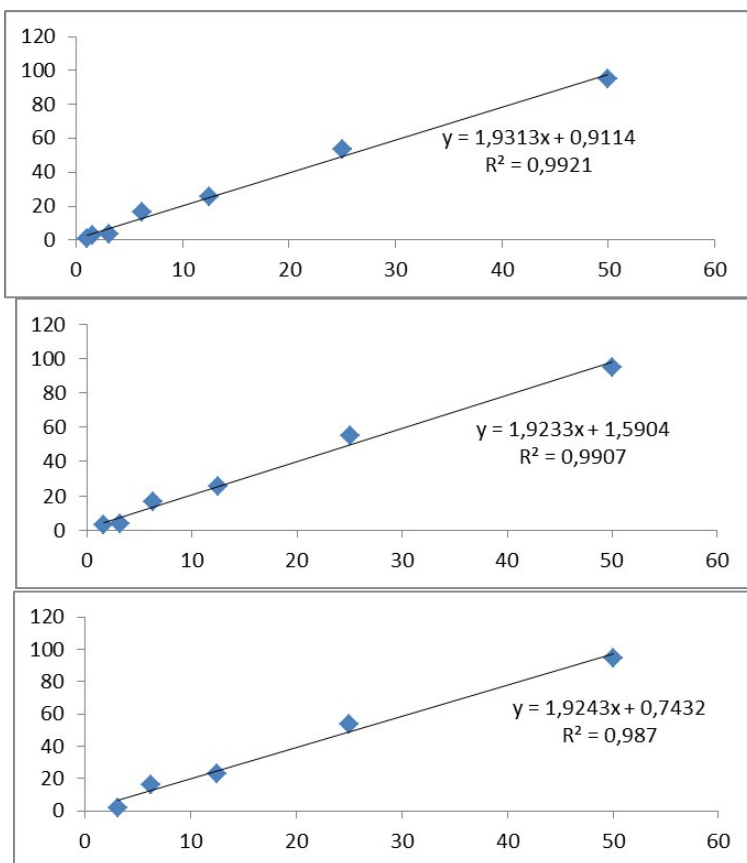

**Fig. S8** Linear plot DPPH Assay of Phenyl Oleuropein Aglicone (5)

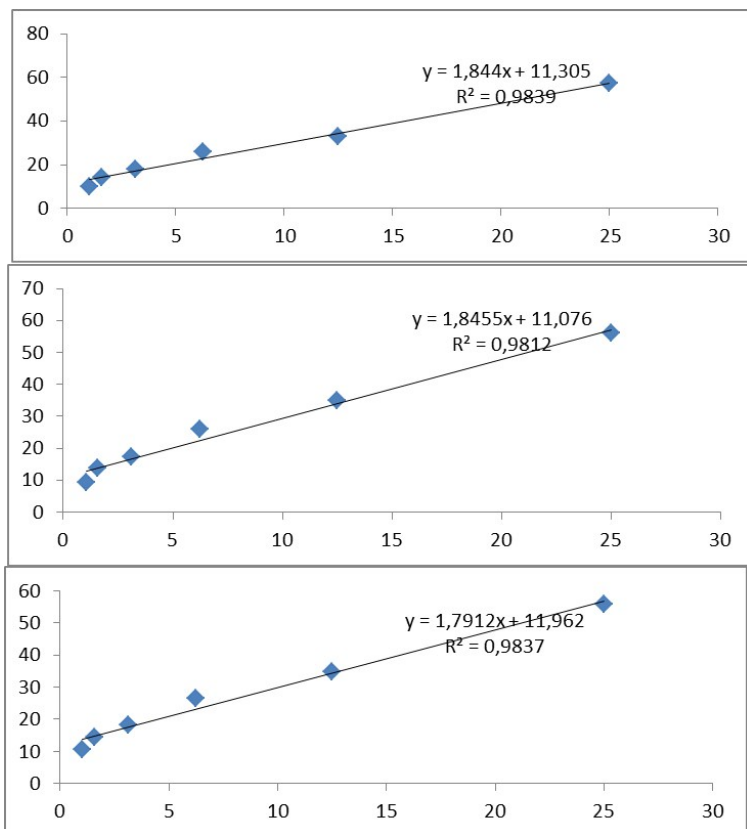

**Fig. S9** Linear plot DPPH Assay of trans-Hexenyl Oleuropein Aglicone (6)

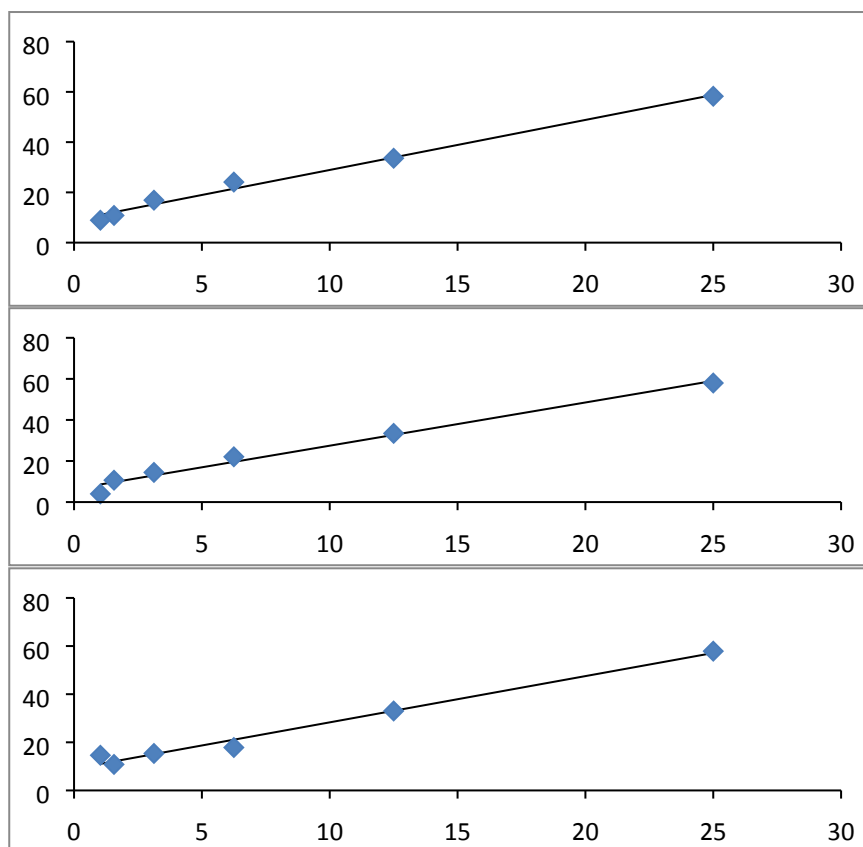

**Fig. S10** Linear plot DPPH Assay of cis-Hexenyl Oleuropein Aglicone (7)

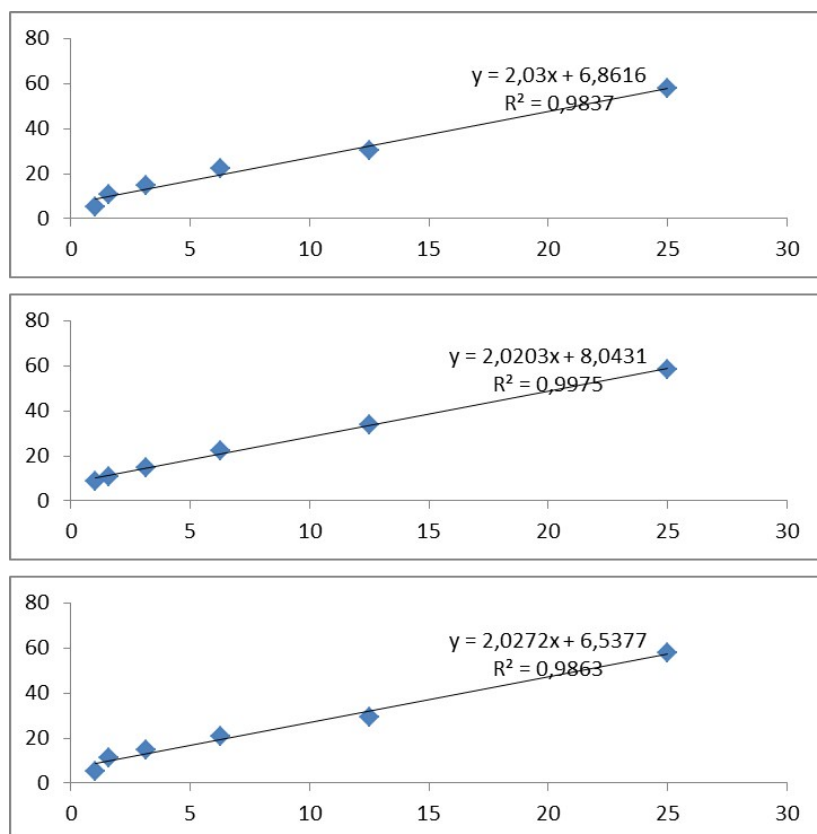

**Fig. S11** Linear plot DPPH Assay of Palmityl Oleuropein Aglicone (8)

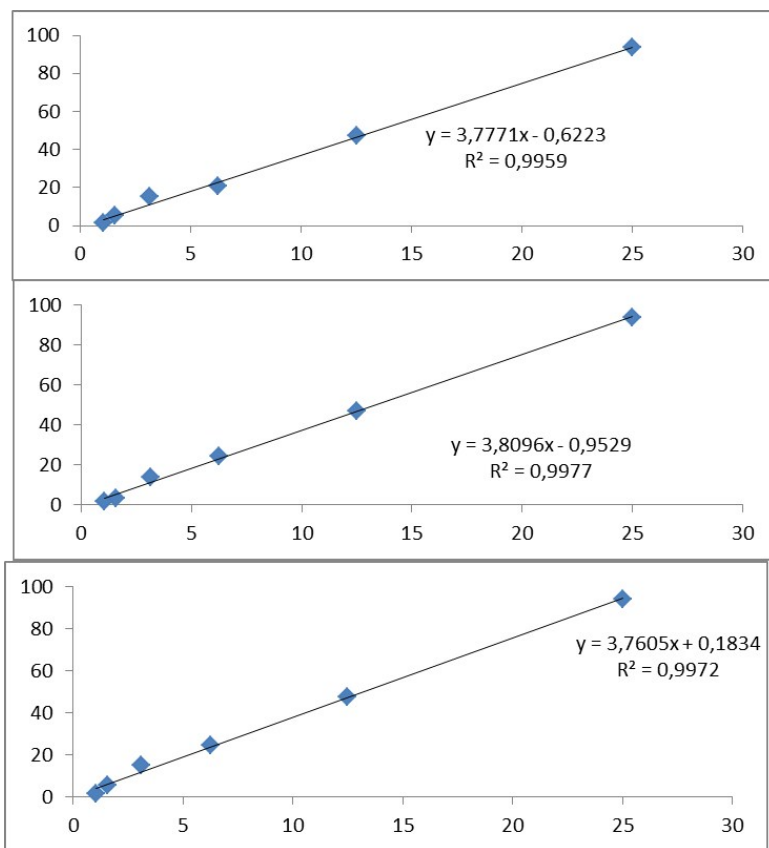

**Fig. S12** Linear plot DPPH Assay of Octyl Oleuropein Aglicone (9)

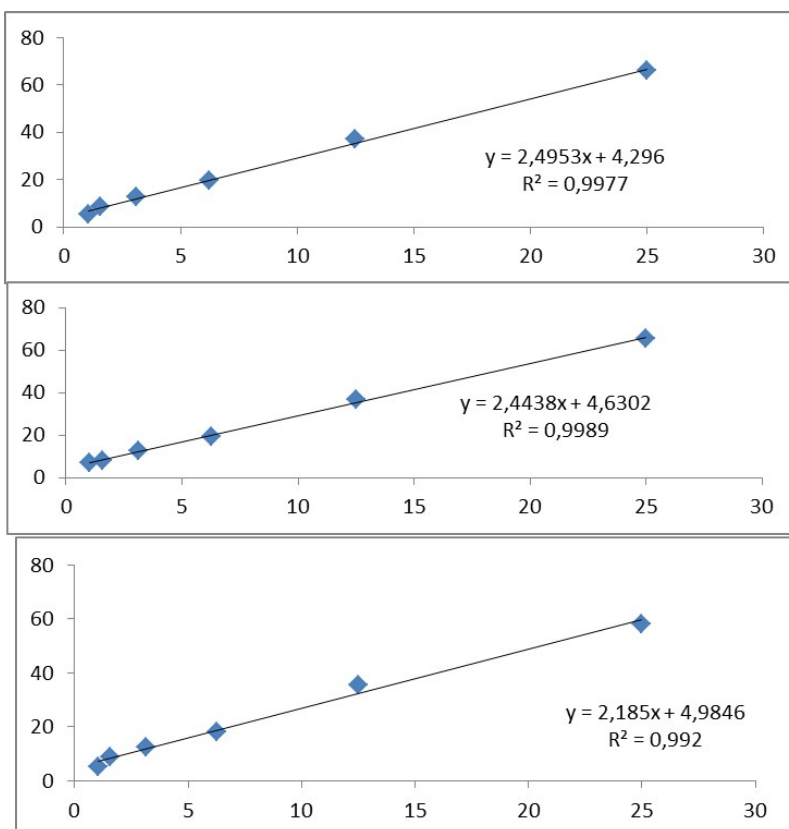

**Fig. S13** Linear plot DPPH Assay of Oleyl Oleuropein Aglicone (10)

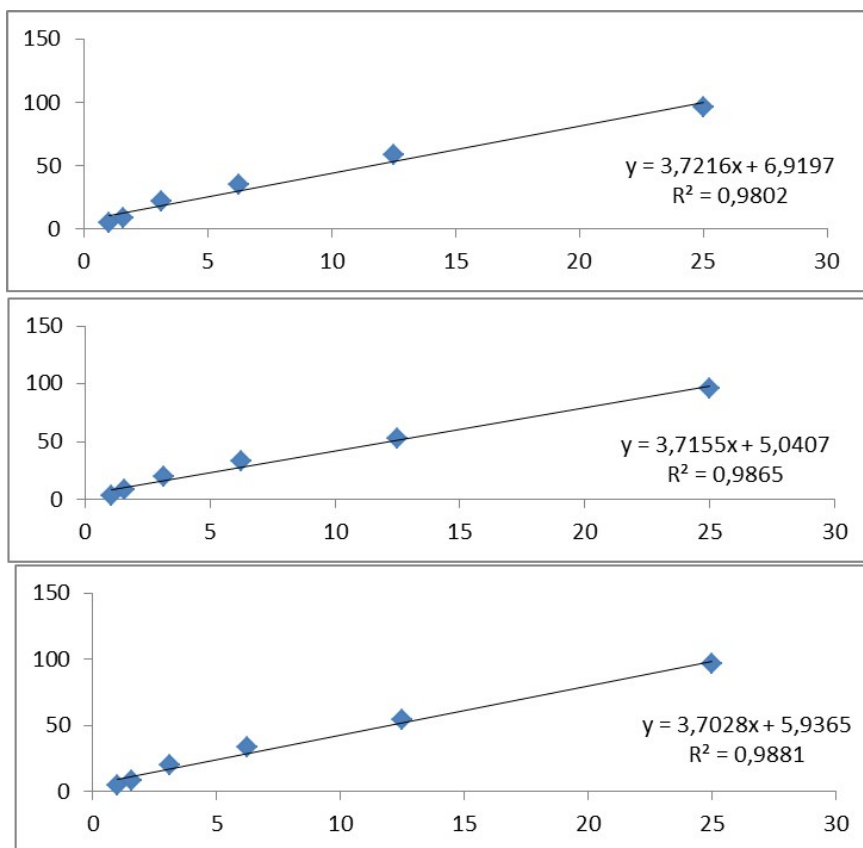

**Fig. S14** IC50 of Oleuropein Aglicone derivatives in DPPH Assay

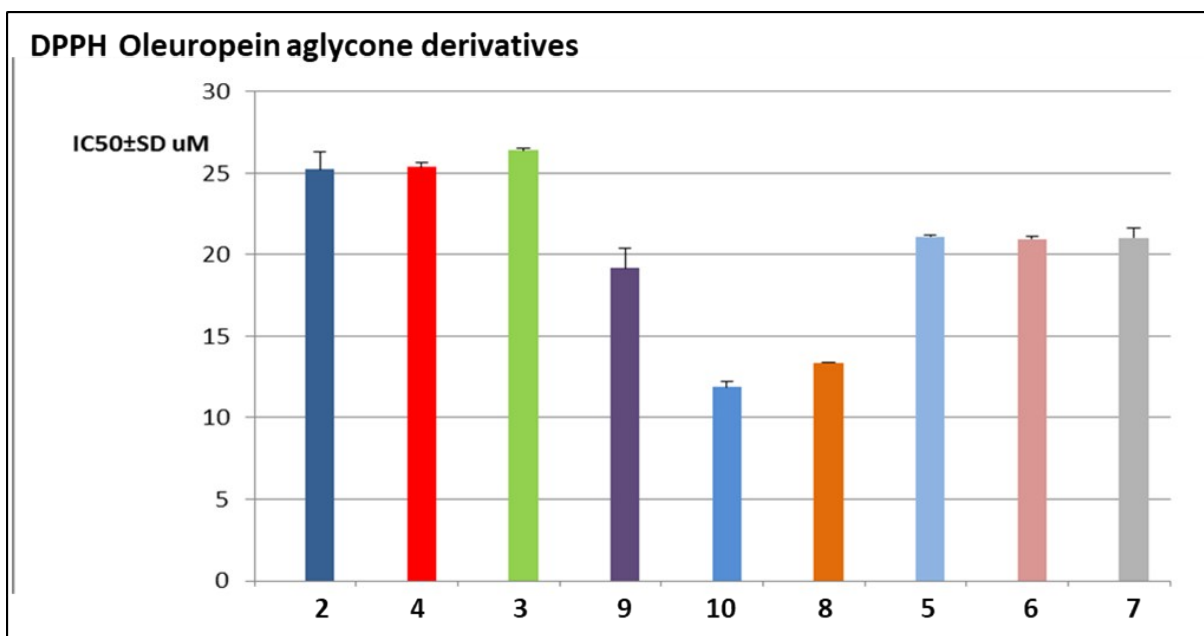

Supplement: c7fo01105a1.pdf [file c7fo01105a1.pdf]
